# Supplementary material for: Antimicrobial and Antibiofilm Properties of Latvian Honey against Causative Agents of Wound Infections
Source: MDPI journal article supplement (doi:10.3390/antibiotics12050816), 2023-04-26
Supplement: s1 [file s1]

|    | Control                                                                                                                                                                                                                                                                  | Apiaceae, Api1                                                                                                                                                                                                                                                            |
|----|--------------------------------------------------------------------------------------------------------------------------------------------------------------------------------------------------------------------------------------------------------------------------|---------------------------------------------------------------------------------------------------------------------------------------------------------------------------------------------------------------------------------------------------------------------------|
| EC | 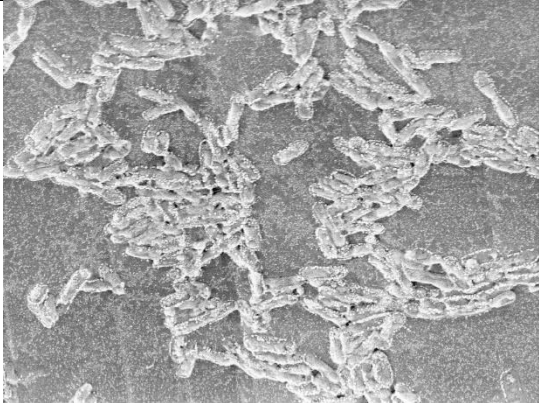 <p>SEM MAG: 10.00 kx<br/>SEM HV: 5.00 kV<br/>WD: 9.504 mm</p> <p>Vac: HiVac<br/>Date(m/d/y): 03/29/22<br/>Det: SE</p> <p>5 µm</p> <p>MIRAI\ TESCAN<br/>Riga Technical University</p>   |  <p>SEM MAG: 10.00 kx<br/>SEM HV: 5.00 kV<br/>WD: 13.85 mm</p> <p>Vac: HiVac<br/>Date(m/d/y): 04/07/22<br/>Det: SE</p> <p>5 µm</p> <p>MIRAI\ TESCAN<br/>Riga Technical University</p>   |
| ES |  <p>SEM MAG: 10.00 kx<br/>SEM HV: 5.00 kV<br/>WD: 12.93 mm</p> <p>Vac: HiVac<br/>Date(m/d/y): 03/29/22<br/>Det: SE</p> <p>5 µm</p> <p>MIRAI\ TESCAN<br/>Riga Technical University</p>  |  <p>SEM MAG: 10.00 kx<br/>SEM HV: 5.00 kV<br/>WD: 14.61 mm</p> <p>Vac: HiVac<br/>Date(m/d/y): 04/07/22<br/>Det: SE</p> <p>5 µm</p> <p>MIRAI\ TESCAN<br/>Riga Technical University</p>  |
| PA |  <p>SEM MAG: 10.00 kx<br/>SEM HV: 5.00 kV<br/>WD: 11.97 mm</p> <p>Vac: HiVac<br/>Date(m/d/y): 04/07/22<br/>Det: SE</p> <p>5 µm</p> <p>MIRAI\ TESCAN<br/>Riga Technical University</p> |  <p>SEM MAG: 10.00 kx<br/>SEM HV: 5.00 kV<br/>WD: 14.11 mm</p> <p>Vac: HiVac<br/>Date(m/d/y): 04/07/22<br/>Det: SE</p> <p>5 µm</p> <p>MIRAI\ TESCAN<br/>Riga Technical University</p> |

|    | Control                                                                                                                                                                                                                                                                 | Apiaceae, Api1                                                                                                                                                                                                                                                           |
|----|-------------------------------------------------------------------------------------------------------------------------------------------------------------------------------------------------------------------------------------------------------------------------|--------------------------------------------------------------------------------------------------------------------------------------------------------------------------------------------------------------------------------------------------------------------------|
| SA | 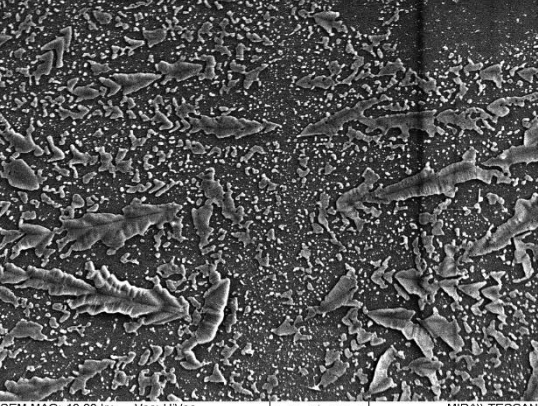 <p>SEM MAG: 10.00 kx<br/>SEM HV: 5.00 kV<br/>WD: 10.01 mm</p> <p>Vac: HiVac<br/>Date(m/d/y): 03/29/22<br/>Det: SE</p> <p>5 µm</p> <p>MIRAI\ TESCAN<br/>Riga Technical University</p>  |  <p>SEM MAG: 10.00 kx<br/>SEM HV: 5.00 kV<br/>WD: 14.24 mm</p> <p>Vac: HiVac<br/>Date(m/d/y): 04/07/22<br/>Det: SE</p> <p>5 µm</p> <p>MIRAI\ TESCAN<br/>Riga Technical University</p>  |
| MR |  <p>SEM MAG: 10.00 kx<br/>SEM HV: 5.00 kV<br/>WD: 11.94 mm</p> <p>Vac: HiVac<br/>Date(m/d/y): 04/04/22<br/>Det: SE</p> <p>5 µm</p> <p>MIRAI\ TESCAN<br/>Riga Technical University</p> |  <p>SEM MAG: 10.00 kx<br/>SEM HV: 5.00 kV<br/>WD: 11.65 mm</p> <p>Vac: HiVac<br/>Date(m/d/y): 04/07/22<br/>Det: SE</p> <p>5 µm</p> <p>MIRAI\ TESCAN<br/>Riga Technical University</p> |

|    | Control                                                                                                                                                                                                                                                   | Manuka                                                                                                                                                                                                                                                     |
|----|-----------------------------------------------------------------------------------------------------------------------------------------------------------------------------------------------------------------------------------------------------------|------------------------------------------------------------------------------------------------------------------------------------------------------------------------------------------------------------------------------------------------------------|
| EC | 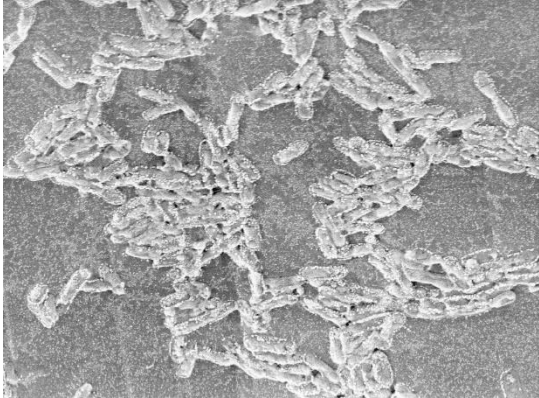 <p>SEM MAG: 10.00 kx    Vac: HiVac<br/>SEM HV: 5.00 kV    Date(m/d/y): 03/29/22    5 µm    MIRAI\ TESCAN<br/>WD: 9.504 mm    Det: SE    Riga Technical University</p>   |  <p>SEM MAG: 10.00 kx    Vac: HiVac<br/>SEM HV: 5.00 kV    Date(m/d/y): 04/05/22    5 µm    MIRAI\ TESCAN<br/>WD: 11.37 mm    Det: SE    Riga Technical University</p>   |
| ES |  <p>SEM MAG: 10.00 kx    Vac: HiVac<br/>SEM HV: 5.00 kV    Date(m/d/y): 03/29/22    5 µm    MIRAI\ TESCAN<br/>WD: 12.93 mm    Det: SE    Riga Technical University</p>  |  <p>SEM MAG: 10.00 kx    Vac: HiVac<br/>SEM HV: 5.00 kV    Date(m/d/y): 04/05/22    5 µm    MIRAI\ TESCAN<br/>WD: 11.30 mm    Det: SE    Riga Technical University</p>  |
| PA |  <p>SEM MAG: 10.00 kx    Vac: HiVac<br/>SEM HV: 5.00 kV    Date(m/d/y): 04/07/22    5 µm    MIRAI\ TESCAN<br/>WD: 11.97 mm    Det: SE    Riga Technical University</p> |  <p>SEM MAG: 10.00 kx    Vac: HiVac<br/>SEM HV: 5.00 kV    Date(m/d/y): 04/05/22    5 µm    MIRAI\ TESCAN<br/>WD: 12.14 mm    Det: SE    Riga Technical University</p> |

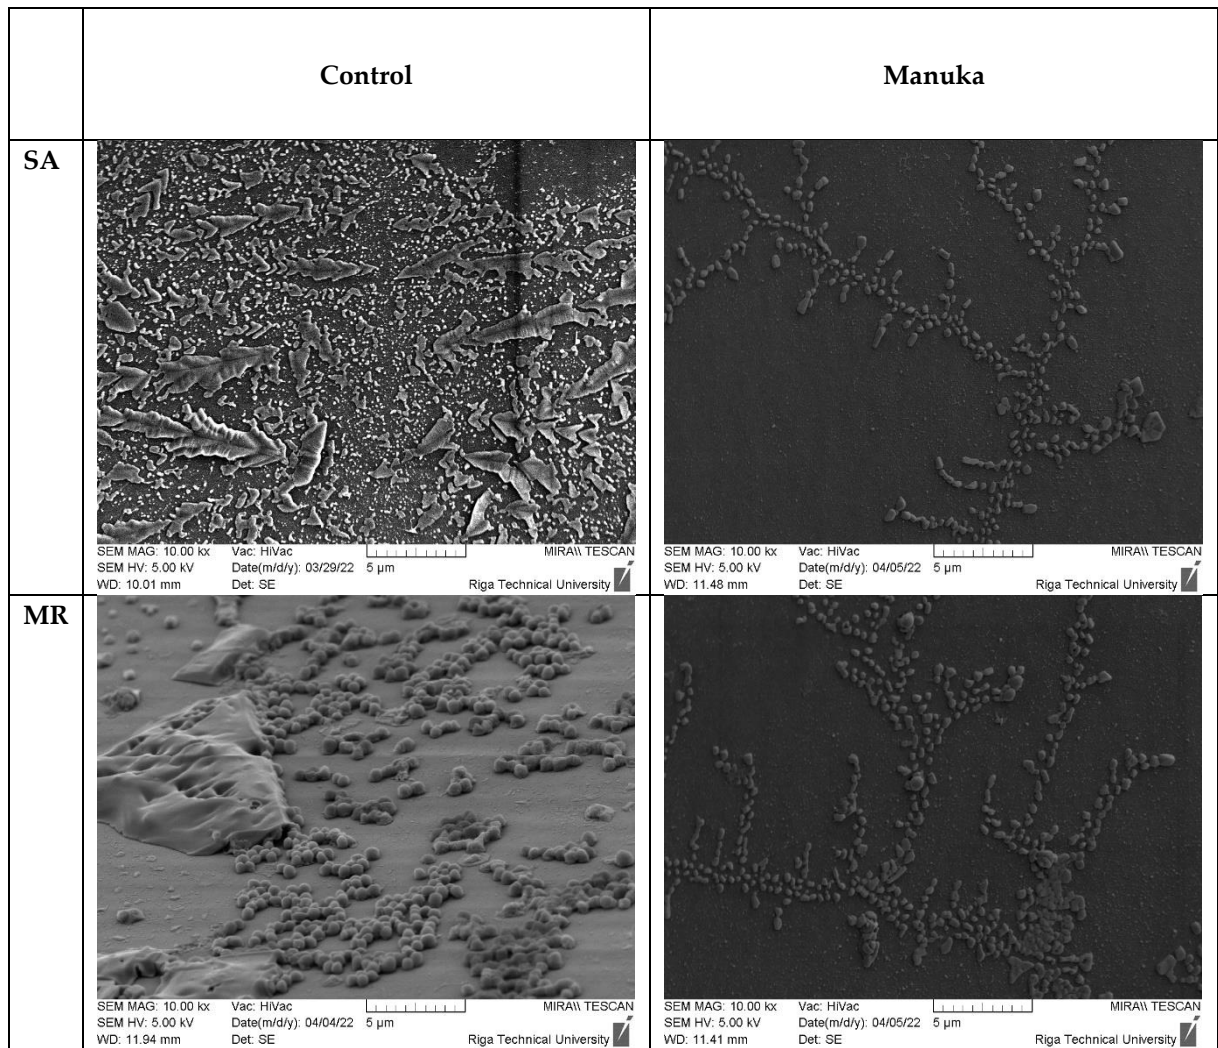

**Figure S2.** Scanning electron microscopic images of antibiofilm activity against *Escherichia coli* (EC) ATCC 25922, Extended-Spectrum Beta-Lactamases (ES), *Pseudomonas aeruginosa* ATCC 27853 (PA), *Staphylococcus aureus* (ATCC 29213) (SA) and Methicillin-resistant *Staphylococcus aureus* (MR): Control samples of bacterial strains, Effect of Apiaceae (Api\_1) honey, and effect of Manuka honey.
