# Supplementary material for: Antimicrobial and Antibiofilm Properties of Latvian Honey against Causative Agents of Wound Infections
Source: MDPI journal article supplement (doi:10.3390/antibiotics12050816), 2023-04-26
Supplement: s1 [file s1]

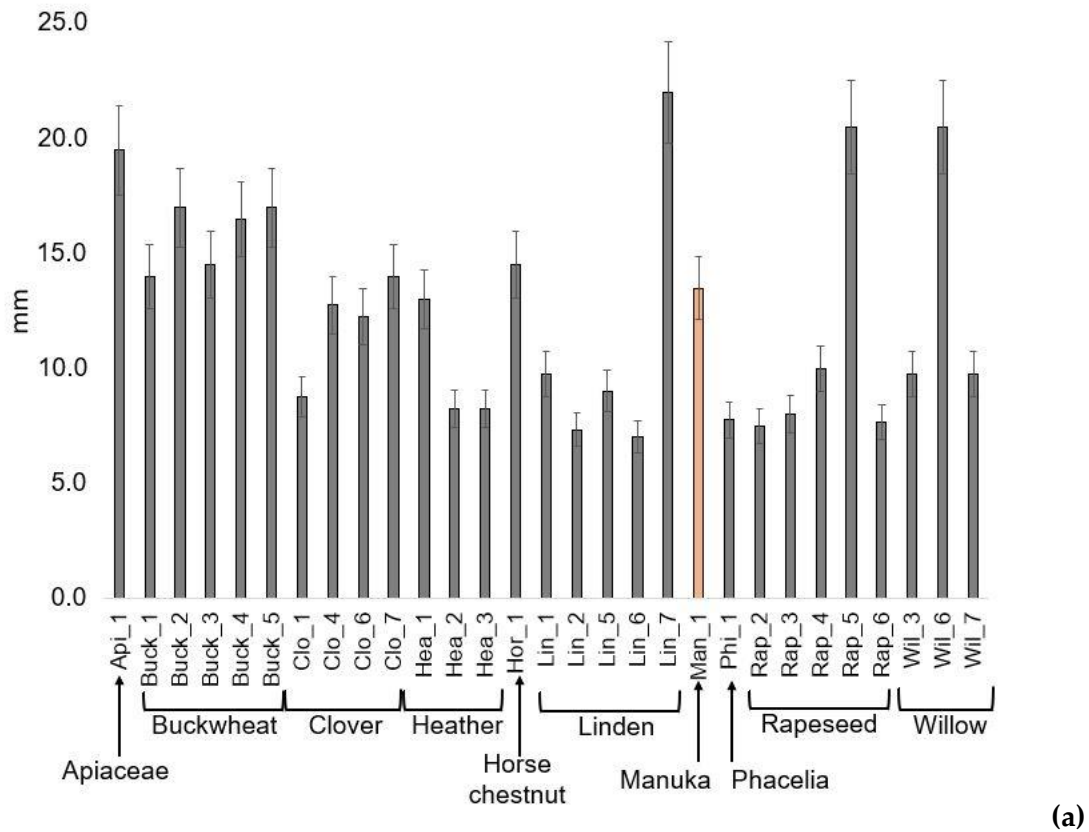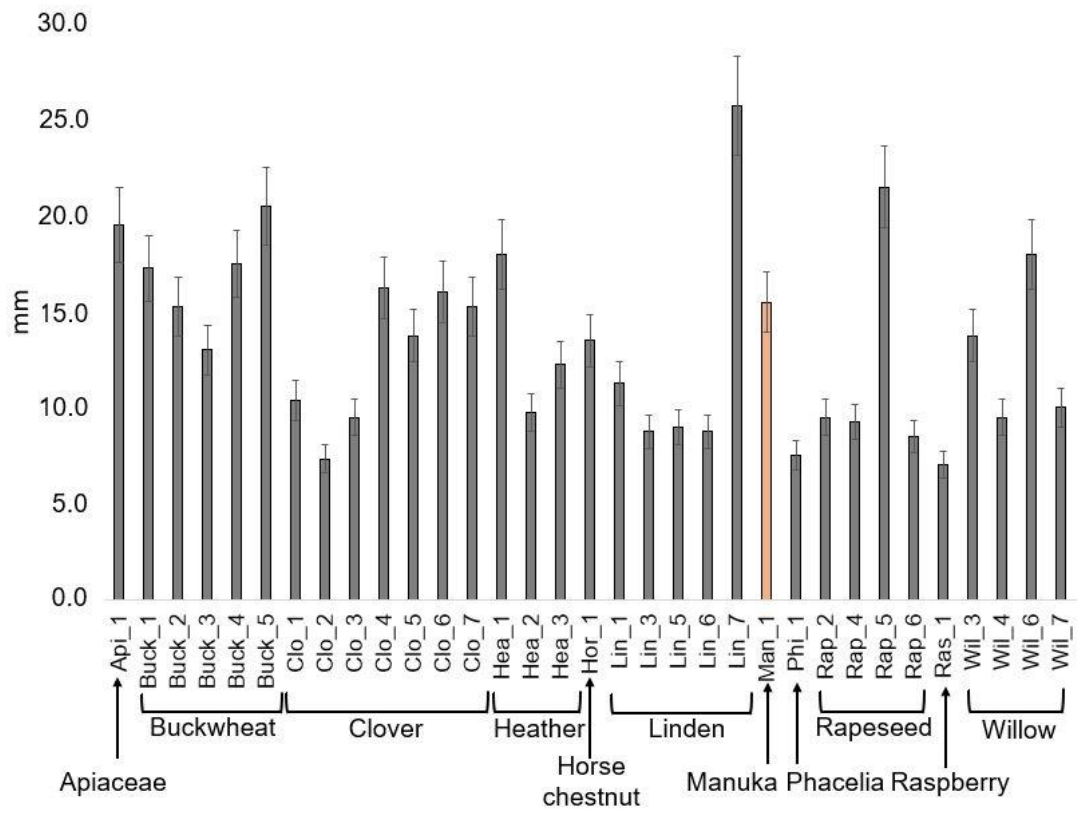

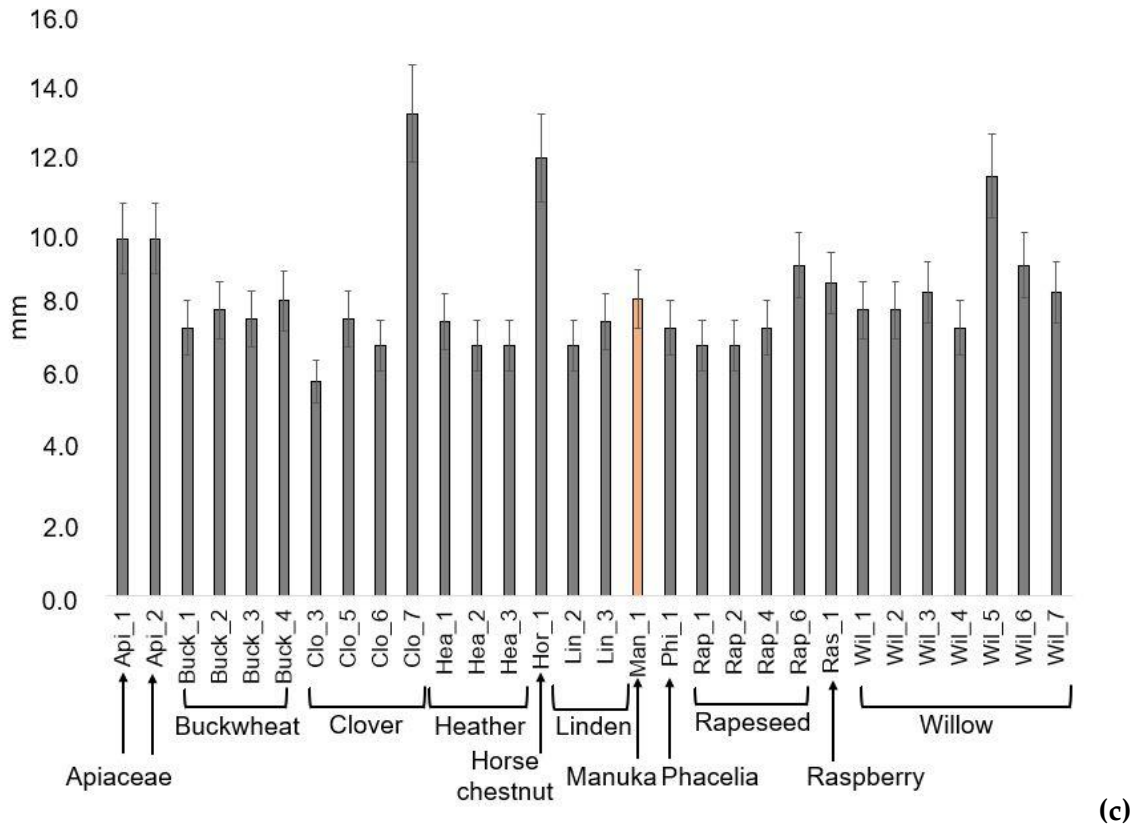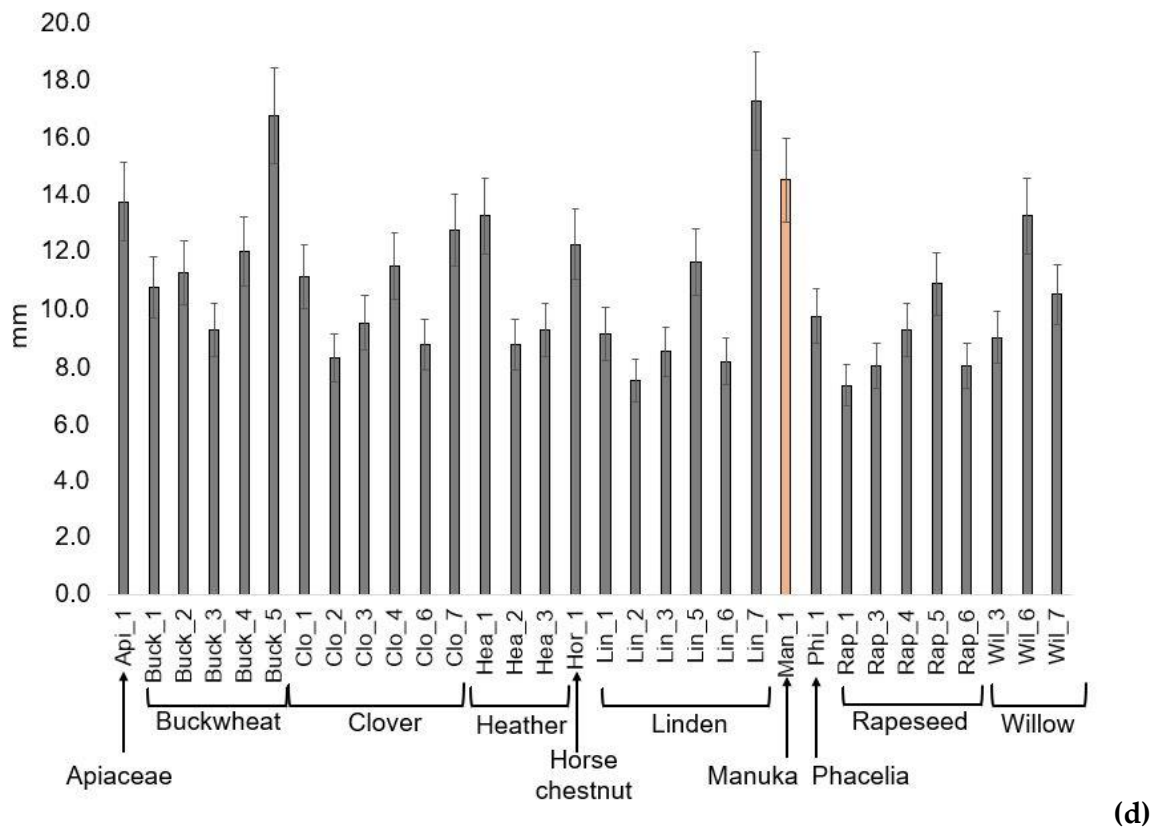

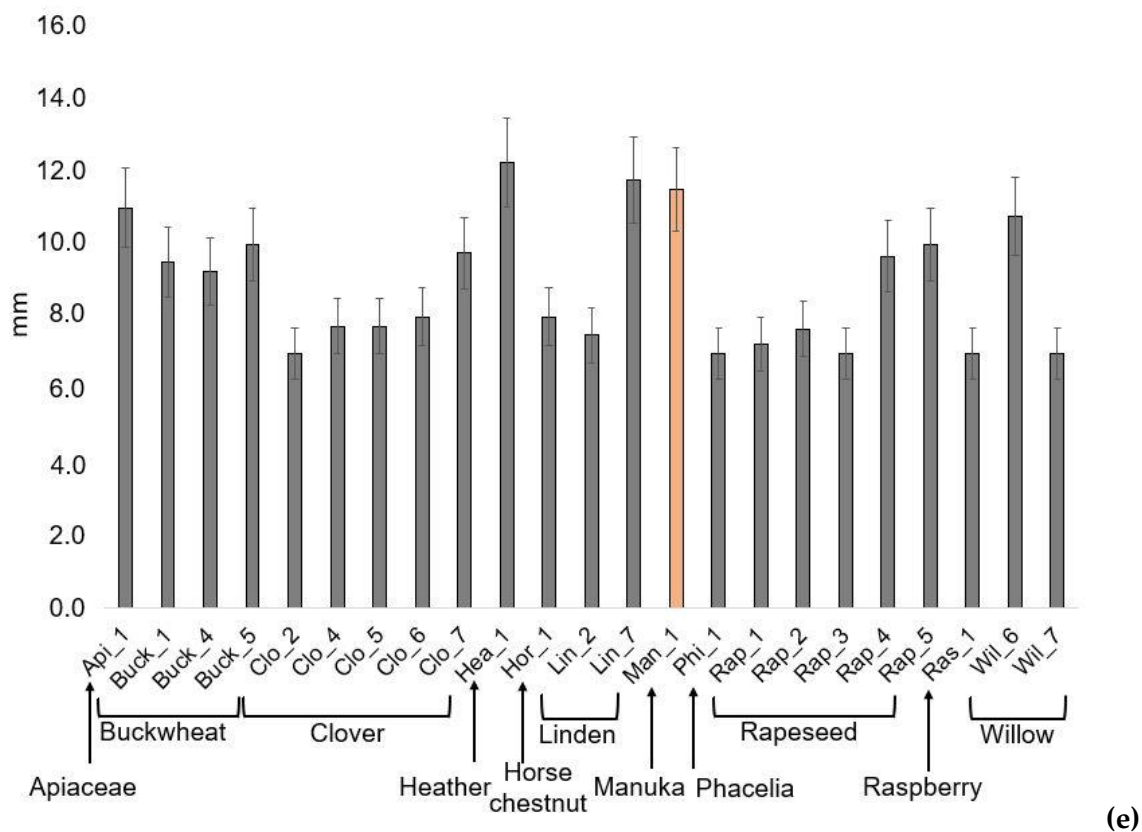

**Figure S1.** Inhibition zones of Latvian and Manuka honey samples for the antimicrobial activity with well-diffusion method. (a) *Staphylococcus aureus* (ATCC 25923); (b) *Methicillin-resistant staphylococcus aureus*; (c) *Pseudomona aeruginosa* (ATCC 14209); (d) *Escherichia coli* (ATCC 25922); (e) *Extended Spectrum Beta-Lactamase*.
